# Supplementary material
Source: PubMed Central journal article supplement (PMC7882857)
Supplement: 592_2020_1636_MOESM1_ESM.pdf [file 592_2020_1636_MOESM1_ESM.pdf]

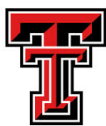

TEXAS TECH UNIVERSITY  
Nutritional Sciences

October 07, 2020

To

Dr. Giuseppe Pugliese

Guest Editor

Acta Diabetologica

Dear Dr. Pugliese,

Please consider our revised review manuscript titled, “**The Triumvirate: Why Hypertension, Obesity, and Diabetes are risk factors for adverse effects in patients with COVID-19.**” Ms. No. ACDI-D-20-00506, for publication in *Acta Diabetologica*.

We would like to thank the reviewers for their positive and encouraging comments. As per the suggestions of the reviewers we have made changes to the manuscript to address the protective effects of ACE2. Additionally, we have added a section to describe the cardiovascular and renal complications associated with the triumvirate, which appear as underlined fonts in the revised manuscript.

We hope you find the manuscript now acceptable for publication *Acta Diabetologica*.

Sincerely,

A handwritten signature in black ink that reads "V. Hegde".

**Vijay Hegde, Ph.D.**

Assistant Professor

Nutritional Sciences Department

Texas Tech University

Telephone: (806) 834-6695

E-mail: vijay.hegde@ttu.edu
